# Supplementary material for: Associations of adherence to Mediterranean-like diet pattern with incident rosacea: A prospective cohort study of government employees in China
Source: PubMed Central journal article supplement (PMC9932686; doi:10.3389/fnut.2023.1092781), 2023-02-02
Supplement: Image_1.pdf [file Image_1.pdf]

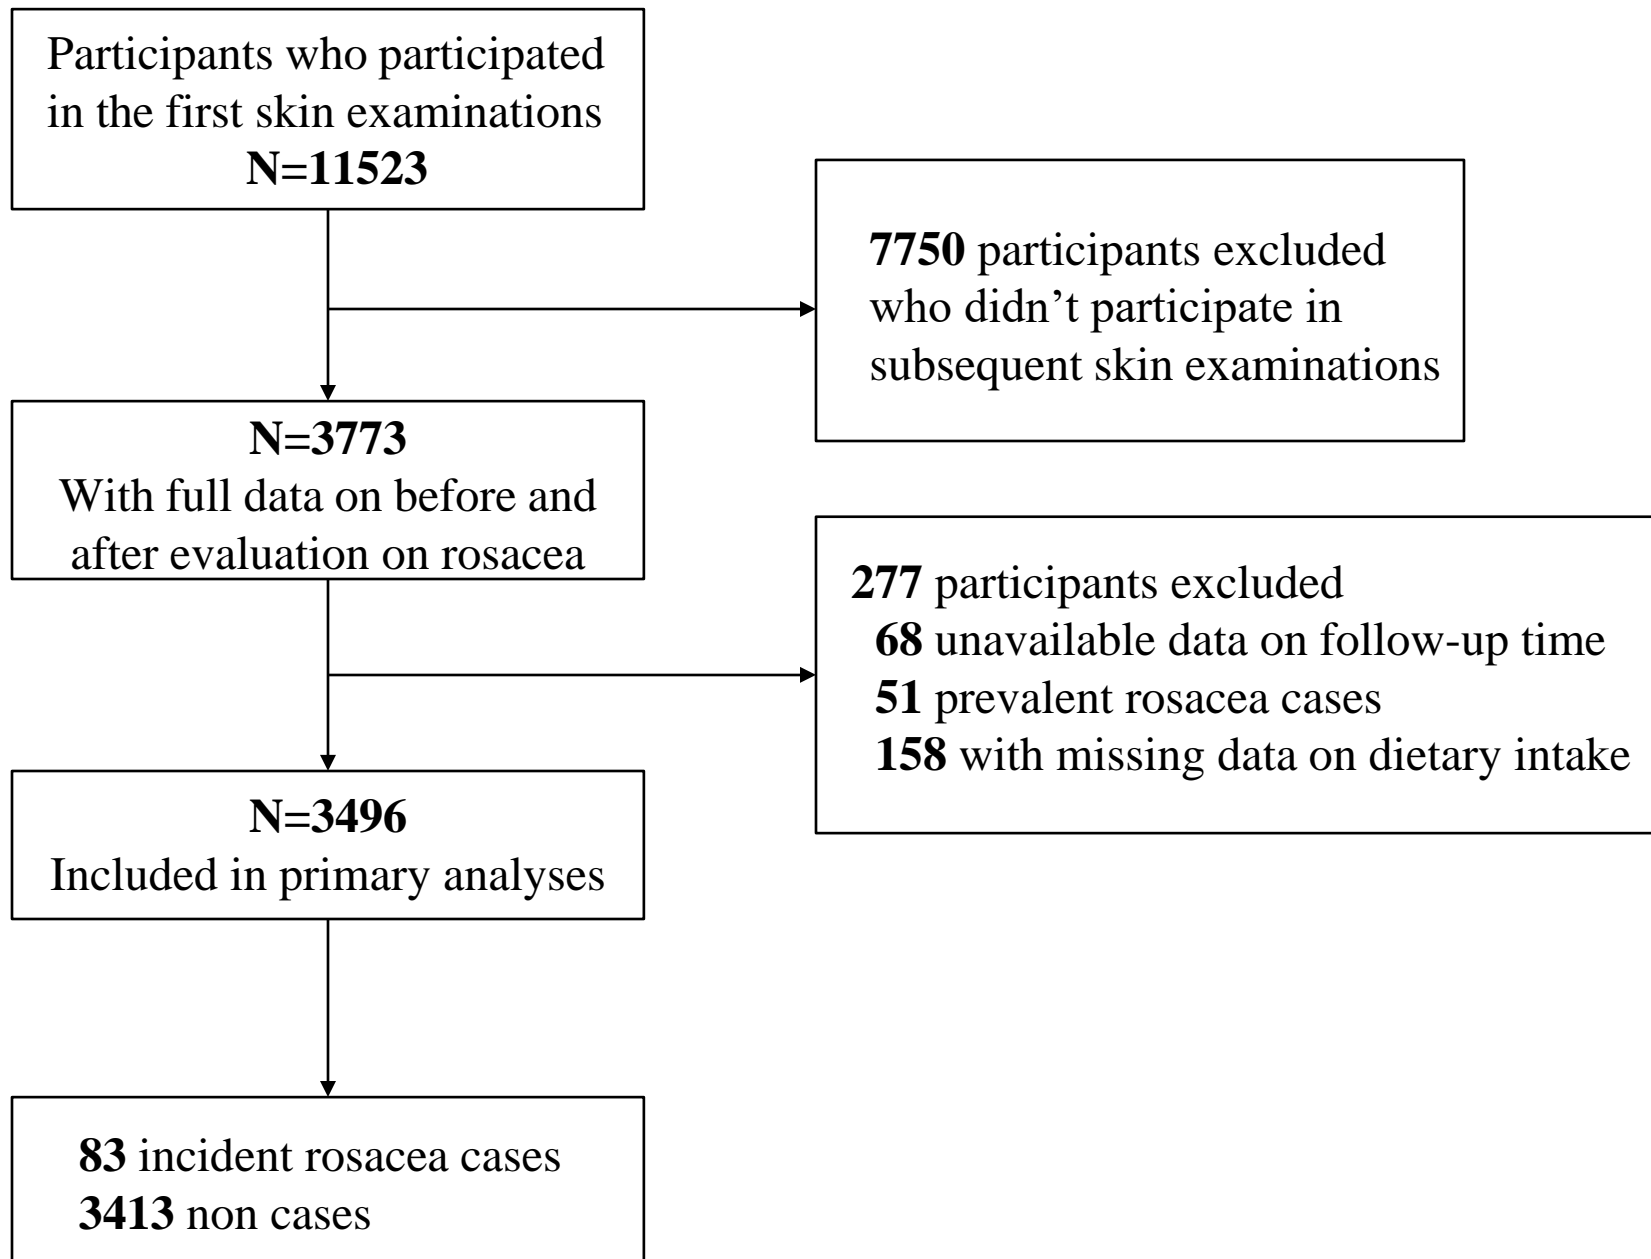

**Figure S1. Study flow chart**
